# Supplementary material for: Efficient detection of p-nitrophenol via a polypyrrole flower-decorated nickel foam-based electrochemical sensor
Source: Royal Society of Chemistry journal article supplement (doi:10.1039/d4nr01580k), 2024-01-01
Supplement: d4nr01580k1.pdf [file d4nr01580k1.pdf]

## Supplementary Information

### Efficient detection of p-nitrophenol via polypyrrole flower-decorated nickel foam based electrochemical sensor

Shiv Dutta Lawaniya<sup>1</sup>, Gaurav Pandey<sup>1</sup>, Yeontae Yu<sup>2</sup>, Kamalendra Awasthi<sup>1\*</sup>

<sup>1</sup>*Department of Physics, Malaviya National Institute of Technology Jaipur, Jaipur-302017, Rajasthan, India*

<sup>2</sup>*Division of Advanced Materials Engineering, Jeonbuk National University, 567, Baekje daero, Deokjin-gu, Jeonju, 54896, South Korea*

[\\*kawasthi.phy@mnit.ac.in](mailto:*kawasthi.phy@mnit.ac.in)

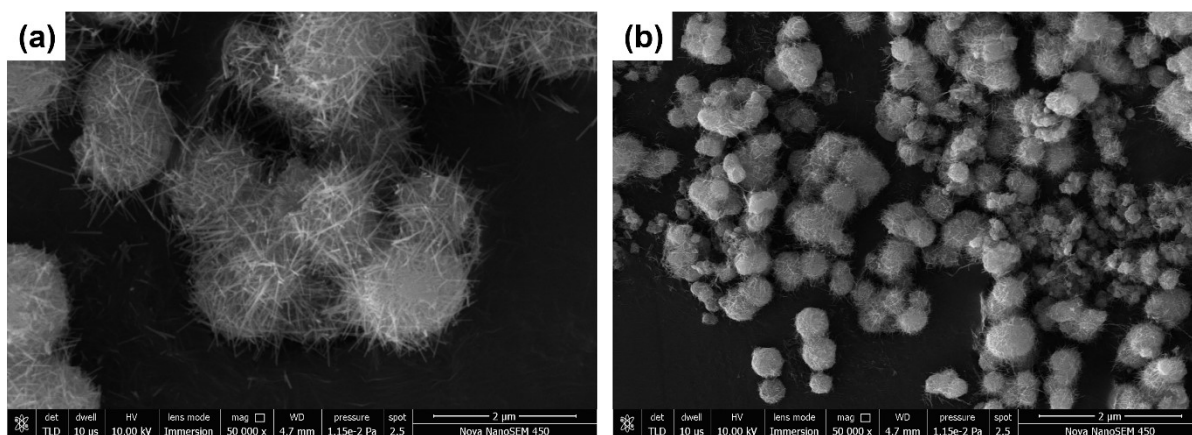

**Fig. S1** FESEM images of MnO<sub>2</sub> flowers synthesized via hydrothermal method.

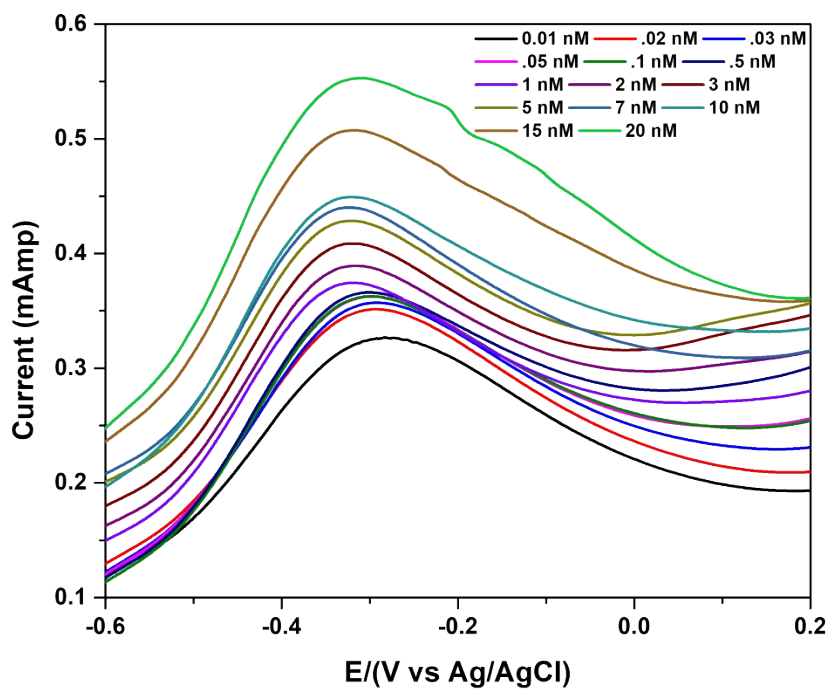

**Fig. S2** Linear sweep voltammetry (LSV) of PPy Fls/Ni foam electrode for 0.01-20 nM pNP concentration.

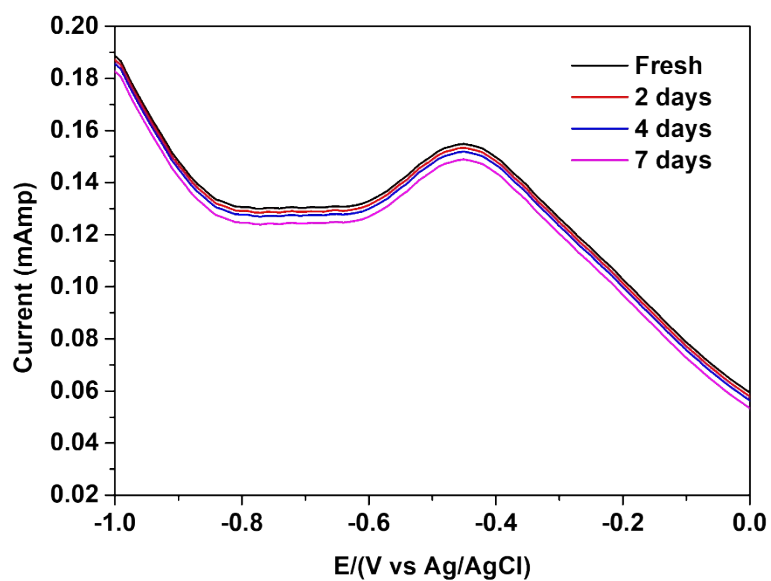

**Fig. S3** DPV of PPy FIs/Ni foam electrode for 10 nM pNP up to 7 days.

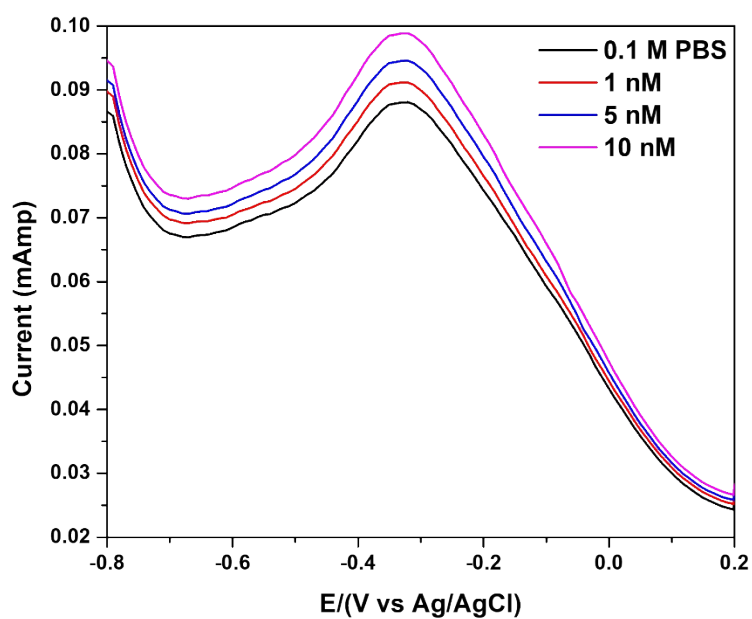

**Fig. S4** DPV of PPy FIs/Ni foam electrode for different concentrations of pNP in ground water medium.

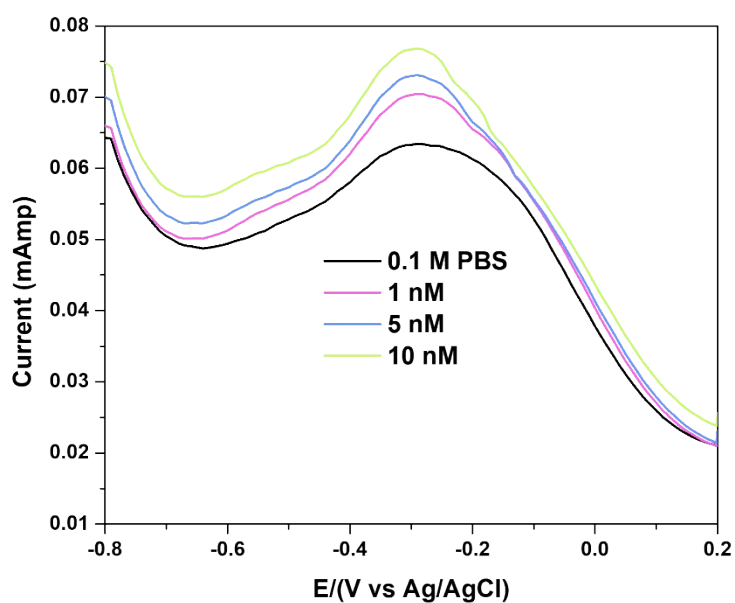

**Fig. S5** DPV of PPy Fls/Ni foam electrode for different concentrations of pNP in tap water medium.

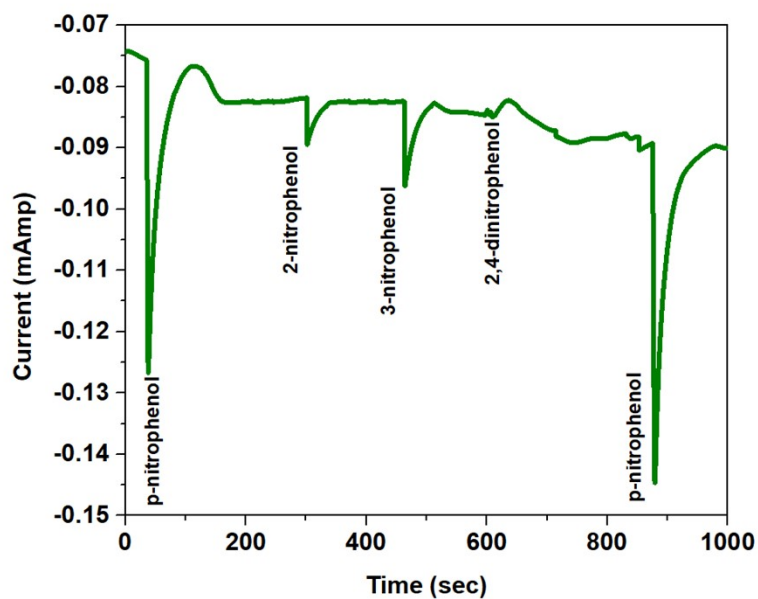

**Fig. S6** Anti-selectivity of proposed electrochemical sensor for p-NP along with its three structural analogues i.e. 2-nitrophenol, 3-nitrophenol and 2,4-dinitrophenol (concentration: 10 nM).
